# Supplementary material for: Elastomers built up through the π–π stacking association of polycyclic planar aromatic diimides
Source: Royal Society of Chemistry journal article supplement (doi:10.1039/c7ra08910d), 2017-01-01
Supplement: c7ra08910d1.pdf [file c7ra08910d1.pdf]

*Supplementary Information*

# Elastomers Built up through $\pi$ - $\pi$ Stacking Association of Polycyclic Planar Aromatic Diimides

Yuji Higaki,<sup>a,b,c</sup> Yudai Kiyoshima,<sup>c</sup> Ken Suzuki,<sup>c</sup> Hirofumi Kabayama,<sup>c</sup>  
Noboru Ohta,<sup>e</sup> Yongsok Seo,<sup>a,d</sup> Atsushi Takahara<sup>a,b,c\*</sup>

<sup>a</sup> *Institute for Materials Chemistry and Engineering, Kyushu University, 744 Motoooka, Nishi-ku, Fukuoka 819-0395, Japan*

<sup>b</sup> *International Institute for Carbon-Neutral Energy Research (WPI-I2CNER), Kyushu University, 744 Motoooka, Nishi-ku, Fukuoka 819-0395, Japan*

<sup>c</sup> *Graduate School of Engineering, Kyushu University, 744 Motoooka, Nishi-ku, Fukuoka 819-0395, Japan*

<sup>d</sup> *Intellectual Textile Research Center and RIAM School of Materials Science and Engineering, Seoul National University, Shillim9dong 56-1, Kwanakku, Seoul, Republic of Korea*

<sup>e</sup> *Japan Synchrotron Radiation Research Institute/SPring-8, 1-1-1 Kouto, Sayo-cho, Sayo-gun, Hyogo 679-5198, Japan*

## Table of Contents

|                                                                                                                               |   |
|-------------------------------------------------------------------------------------------------------------------------------|---|
| 1. <sup>1</sup> H NMR spectra of the copolymers .....                                                                         | 2 |
| 2. Structural parameters obtained by curve fitting of the SAXS intensity profile on the basis of pseudo-two-phase model ..... | 3 |
| 3. Arrhenius plots for relaxations in the DMA data of the copolymer films and calculated activation energies .....            | 4 |
| 4. Stress-strain curve for the PI2000-P films .....                                                                           | 5 |
| 5. Thermogravimetric analysis data and appearance of the residues after TGA .....                                             | 6 |

## 1. $^1\text{H}$ NMR spectra of the copolymers

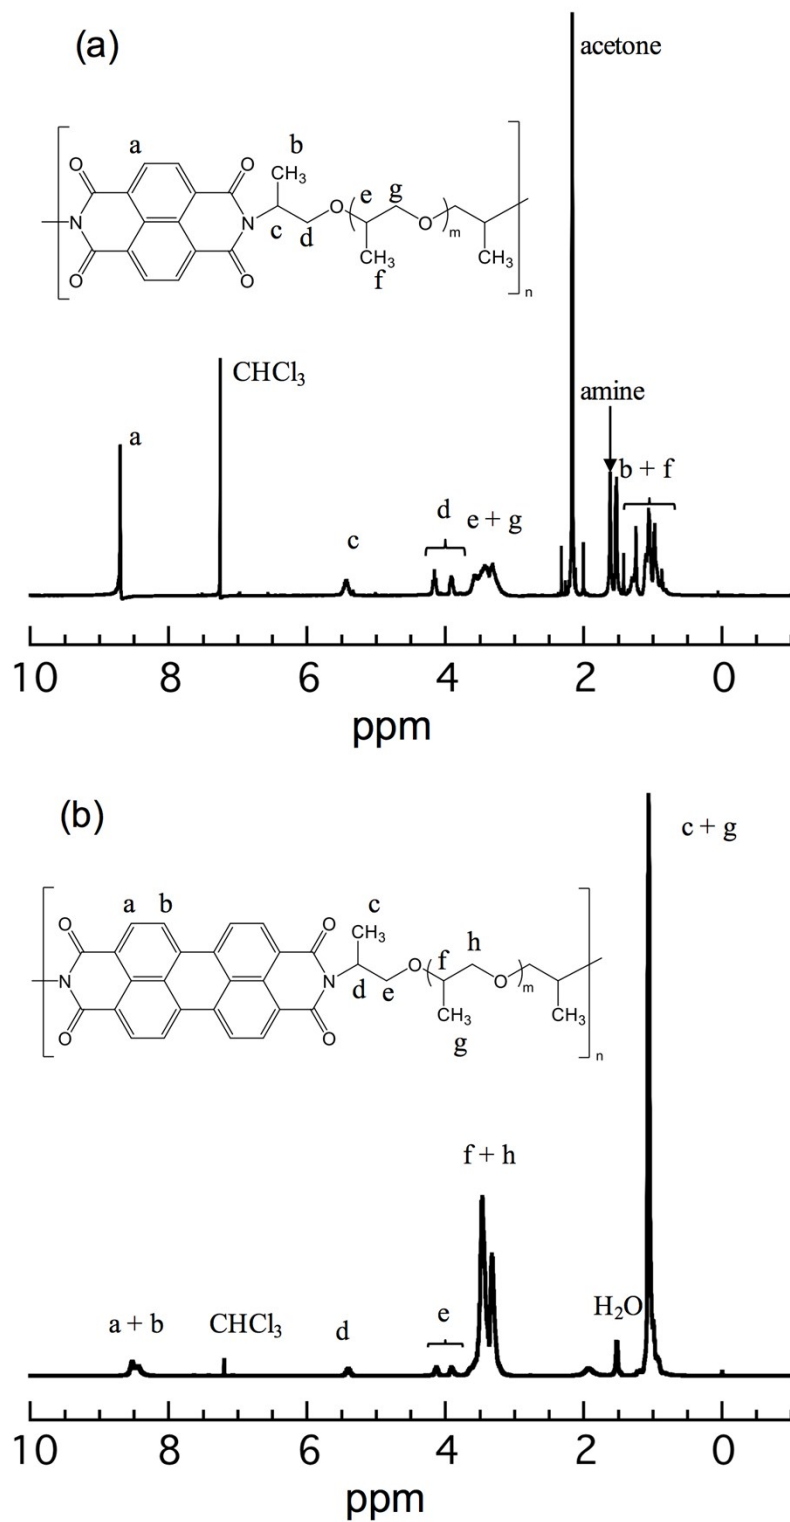

**Figure S1.**  $^1\text{H}$  NMR spectra of the copolymers (a) PI400-N, and (b) PI2000-P.

## 2. Structural parameters obtained by curve fitting of the SAXS intensity profile on the basis of pseudo-two-phase model

**Table S1.** Structural parameters obtained by curve fitting of the SAXS intensity profile for PI2000-P film on the basis of pseudo-two-phase model

| $L / \text{\AA}$ | $L_1 / \text{\AA}$ | $\Delta / \text{\AA}$ | $\sigma_{L_1} / \text{\AA}$ | $\sigma / \text{\AA}$ |
|------------------|--------------------|-----------------------|-----------------------------|-----------------------|
| 50.8             | 11.0               | 0.87                  | 0.02                        | 0.05                  |

In order to verify the thickness of each lamella phase, the SAXS intensity profile of PI2000-P film was fitted with calculated intensity profile on the basis of the pseudo-two-phase model. In the pseudo-two-phase model, the density changes sigmoidally at the interface, which is given by the one-dimensional convolution product of a step function for an ideal two-phase model and a Gaussian smoothing function [1].

$L$  : long spacing of the lamellar structure

$L_1$  : lamellar thickness of high density phase

$\Delta$  : standard deviation of the long period  $L$

$\sigma$  : a parameter that is relate to the interface thickness  $t$  by the equation  $t = (2\pi)^{1/2}/\sigma$

[1] R. Ishige, T. Ishii, M. Tokita, M. Koga, S. Kang, J. Watanabe. *Macromolecules* 2011, *44*, 4586-4588.

### 3. Arrhenius plots for relaxations in the DMA data of the copolymer films and calculated activation energies

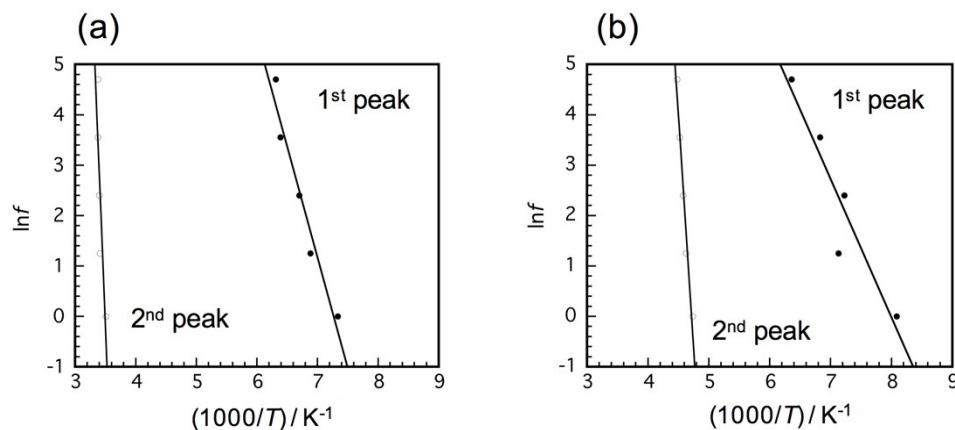

**Figure S2.** Arrhenius plots for relaxations in the DMA data of the copolymer films (a) PI400-N and (b) PI2000-P. The filled circles are data for the 1<sup>st</sup> peak, and the open circles are data for the 2<sup>nd</sup> peak in DMA profiles.

**Table S2.** Activation energies of the first and second relaxations observed in dynamic loss modulus in DMA calculated from the Arrhenius plots

| PI400-N <sup>a</sup>                     |                                          | PI2000-P <sup>b</sup>                    |                                          |
|------------------------------------------|------------------------------------------|------------------------------------------|------------------------------------------|
| $\Delta H_{1st}$ (kJ mol <sup>-1</sup> ) | $\Delta H_{2nd}$ (kJ mol <sup>-1</sup> ) | $\Delta H_{1st}$ (kJ mol <sup>-1</sup> ) | $\Delta H_{2nd}$ (kJ mol <sup>-1</sup> ) |
| 36.4                                     | 249.4                                    | 22.8                                     | 153.2                                    |

<sup>a</sup>Determined from Arrhenius plots for relaxations found in dynamic loss modulus at 158 K (1<sup>st</sup> peak, 110 Hz) and 297 K (2<sup>nd</sup> peak, 110 Hz). <sup>b</sup>Determined from Arrhenius plots for relaxations found in dynamic loss modulus at 157 K (1<sup>st</sup> peak, 110 Hz) and 223 K (2<sup>nd</sup> peak, 110Hz).

#### 4. Stress-strain curve for the PI2000-P films

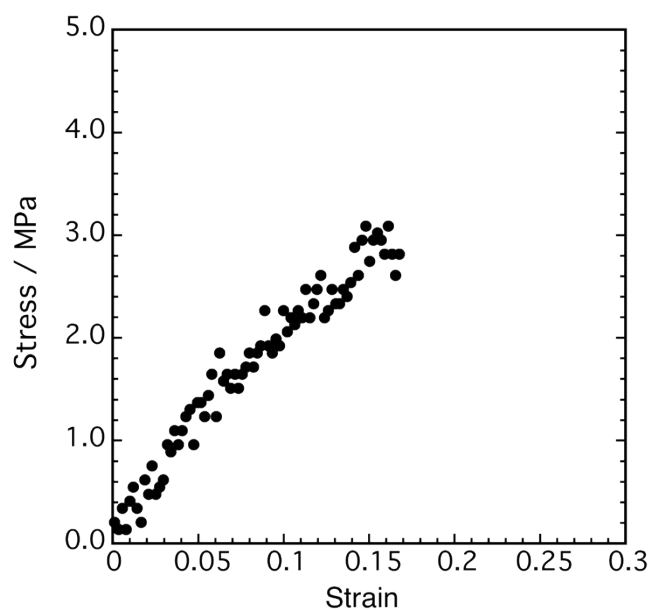

**Figure S3.** Stress-strain curve for the PI2000-P films. Tensile tests were carried out using an EZ-Graph tensile tester (Shimadzu Co., Ltd) with 50 N load cell. The gauge length was 10 mm. Samples were extended at a crosshead speed of 10 mm/min at 298 K. The strain was calculated based on the crosshead displacement. The elastic modulus was determined by following equation

$$\alpha\sigma = E\varepsilon^n \quad (\text{S1})$$

where the  $\alpha$  is stretch ratio,  $E$  is elastic modulus. We calculated the  $E$  in the strain range where the  $n$  is equal to 1.

#### 4. Thermogravimetric analysis data and appearance of the residues after TGA analysis

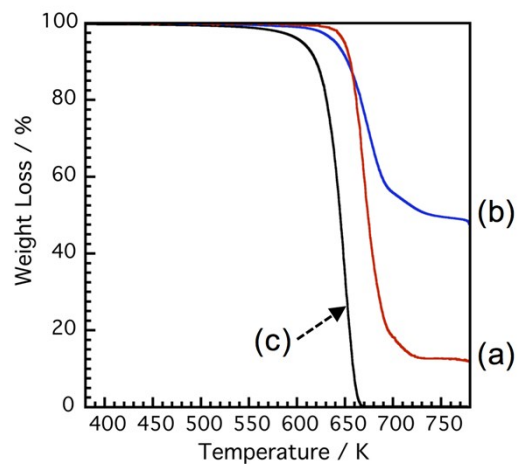

**Figure S4.** Thermogravimetric analysis profiles for (a) PI400-N, (b) PI2000-P, and (c) hydroxy-terminated poly(propylene glycol) ( $M_w$ : 2500). Heating rate was set at  $10 \text{ K min}^{-1}$ .

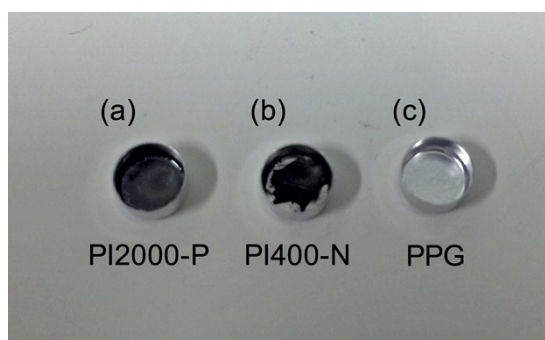

**Figure S5.** Photograph of residues after TGA analysis. (a) PI2000-P, (b) PI400-N, and (c) hydroxy-terminated poly(propylene glycol) ( $M_w$ : 2500). The TGA analysis was carried out in a temperature range of 300 K to 820 K.
